# Supplementary material
Source: PubMed Central journal article supplement (PMC6867399)

**Supporting Information Figure.** Volumes of corpus callosum (at the midline level, of the interhemispheric cleft) and lateral ventricles in the control group (CON) and very preterm and/or low birth weight group (VP/VLBW). Volumes represent the white matter and corticospinal fluid segments resulting from SPM8 (<http://www.fil.ion.ucl.ac.uk/spm>) segmentation of the normalized T1-weighted images intersected with Juelich or Harvard atlas masks of corpus callosum respectively the lateral ventricles (from FSL [www.fmrib.ox.ac.uk/fsl/](http://www.fmrib.ox.ac.uk/fsl/)). The six representative subjects from Figure 3 (a-c control subjects, d-f VP/VLBW subjects) are exemplified as normalized T1-w images (linearly coregistered to Montreal Neurological Institute standard space) and their respective volumes are marked as filled circles and a-f labels in the boxplots. In the T1-w images, (e) shows an obvious thinning of the corpus callosum and the black arrows in (d) and (e) show enlarged ventricles. The black horizontal line in the plots depicts one standard deviation below respectively above the mean of the control subjects.

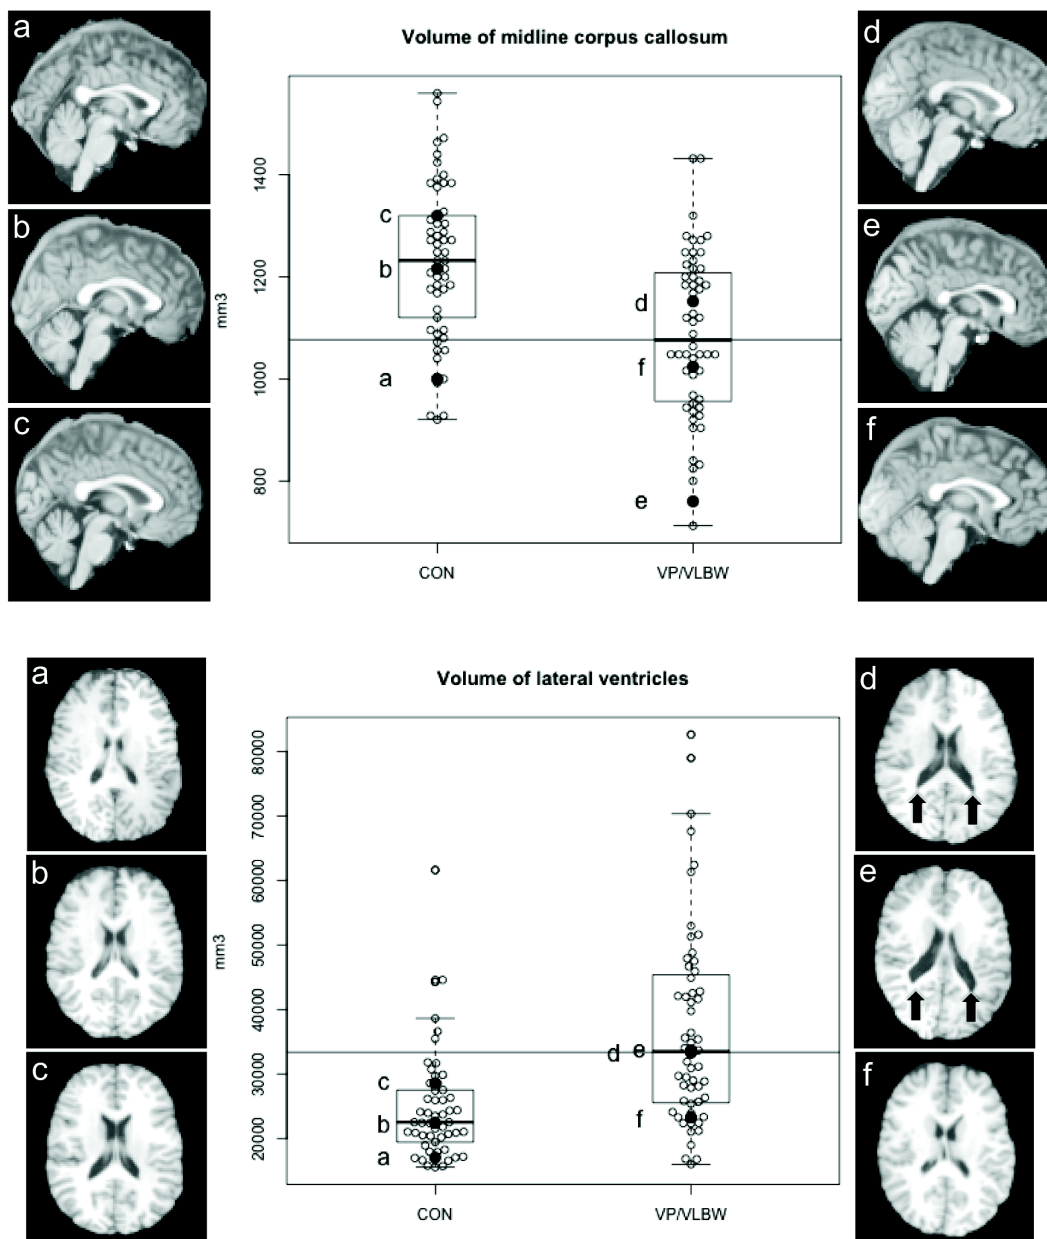

Supplement: HBM-37-289-s001.pdf [file HBM-37-289-s001.pdf]
